# Supplementary material for: Public funding of health at the district level in Indonesia after decentralization – sources, flows and contradictions
Source: Health Res Policy Syst. 2009 Apr 16;7:5. doi: 10.1186/1478-4505-7-5 (PMC2678112; doi:10.1186/1478-4505-7-5)
Supplement: Additional File 1 — Additional Table 1. Public spending on health (realization) at the DISTRICT HEALTH OFFICE and PUSKESMAS by source and expenditure category 2006 financial year. Table showing template for collection of public expenditure on health at the district level. [file 1478-4505-7-5-S1.pdf]

**Additional Table 1. Public spending on health (realization) at the DISTRICT HEALTH OFFICE and PUSKESMAS by source and expenditure category 2006 financial year**

| Source of funds                                | Salaries and remuneration |    |       | Non-salaries and remuneration |    |       | Totals |       | TOTAL |
|------------------------------------------------|---------------------------|----|-------|-------------------------------|----|-------|--------|-------|-------|
|                                                | DHO                       | HC | Total | DHO                           | HC | Total | Dinas  | Pusk. |       |
| I. NATIONAL BUDGET                             |                           |    |       |                               |    |       |        |       |       |
| 1. General Allocation Fund (DAK)               |                           |    |       |                               |    |       |        |       |       |
| 2. Tied funds (Tugas Pembantuan)               |                           |    |       |                               |    |       |        |       |       |
| Construction, Equipment, Vehicles              |                           |    |       |                               |    |       |        |       |       |
| 3. Deconcentration funds                       |                           |    |       |                               |    |       |        |       |       |
| National immunization week                     |                           |    |       |                               |    |       |        |       |       |
| Maternal health                                |                           |    |       |                               |    |       |        |       |       |
| Child health                                   |                           |    |       |                               |    |       |        |       |       |
| Basic health care                              |                           |    |       |                               |    |       |        |       |       |
| Health management and policy                   |                           |    |       |                               |    |       |        |       |       |
| Nutrition                                      |                           |    |       |                               |    |       |        |       |       |
| Health promotion and community empowerment     |                           |    |       |                               |    |       |        |       |       |
| Control of food, drug and dangerous substances |                           |    |       |                               |    |       |        |       |       |
| 4. Salaries and remuneration                   |                           |    |       |                               |    |       |        |       |       |
| Permanent civil servants                       |                           |    |       |                               |    |       |        |       |       |
| Contract                                       |                           |    |       |                               |    |       |        |       |       |
| Honoraria                                      |                           |    |       |                               |    |       |        |       |       |
| 5. Health insurance for the poor               |                           |    |       |                               |    |       |        |       |       |
| II. PROVINCIAL BUDGET                          |                           |    |       |                               |    |       |        |       |       |
| 1. Salaries and remuneration                   |                           |    |       |                               |    |       |        |       |       |
| Contract                                       |                           |    |       |                               |    |       |        |       |       |
| Honoraria                                      |                           |    |       |                               |    |       |        |       |       |
| 2. Program                                     |                           |    |       |                               |    |       |        |       |       |
| 3. Governor's assistance                       |                           |    |       |                               |    |       |        |       |       |
| III. DISTRICT                                  |                           |    |       |                               |    |       |        |       |       |
| 1. Salaries                                    |                           |    |       |                               |    |       |        |       |       |
| Contract                                       |                           |    |       |                               |    |       |        |       |       |
| Fee-for-service                                |                           |    |       |                               |    |       |        |       |       |
| Honoraria                                      |                           |    |       |                               |    |       |        |       |       |
| 2. Routine non-salary                          |                           |    |       |                               |    |       |        |       |       |
| 3. Program                                     |                           |    |       |                               |    |       |        |       |       |
| IV. Loans and grants                           |                           |    |       |                               |    |       |        |       |       |
| TOTAL                                          |                           |    |       |                               |    |       |        |       |       |
